# Supplementary material for: A High-Throughput Microfluidic Cell Sorter Using a Three-Dimensional Coupled Hydrodynamic-Dielectrophoretic Pre-Focusing Module
Source: Micromachines (Basel). 2023 Sep 22;14(10):1813. doi: 10.3390/mi14101813 (PMC10609158; doi:10.3390/mi14101813)
Supplement: Supplementary file 1 [file micromachines-14-01813-s001.zip]

Archive with 4 entries (4 files):
- micromachines-2533364-supplementary.pdf
- Video S1.avi
- Video S2.mp4
- Video S3.mp4
